# Supplementary material for: Structures of Bdellovibrio bacteriovorus phosphoglucose isomerase reveal novel rigidity in the active site of a selected subset of enzymes upon substrate binding
Source: bioRxiv or medRxiv preprint supplement (doi:10.1101/2021.03.26.437203), 2021-03-26
Supplement: Supplementary file [file media-1.pdf]

## Supplementary Materials

**Supplementary Table.1** Primers used to clone *Bb*PGI into a modified pET-41c vector

| Primer direction      | Primer Sequence                                               |
|-----------------------|---------------------------------------------------------------|
| Forward<br>(5' to 3') | GCAGCGGCCTGGTGCCGCGCGGCAGCCATATGCACGTTATGTTGGAGATTTTCGCATTTCG |
| Reverse<br>(5' to 3') | CTCAGTGGTGGTGGTGGTGGTGCTCGAGTCAAGCTTTCTTCAATTTCTCTTTTCG       |

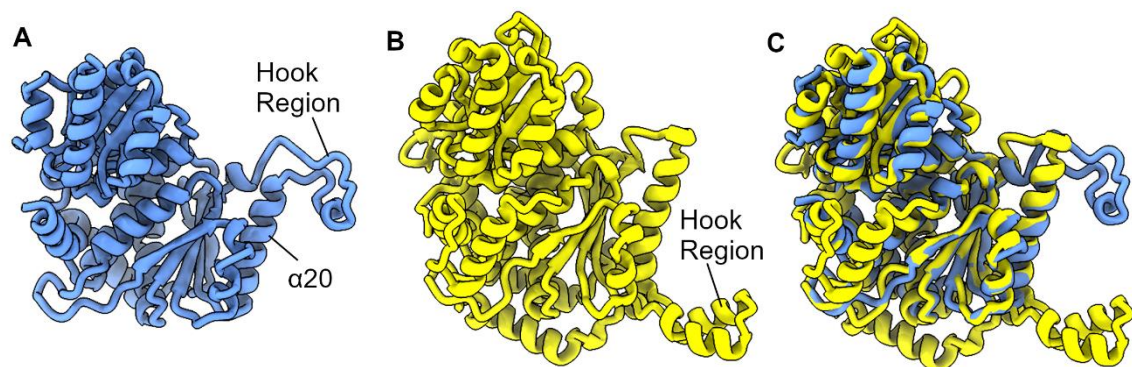

**Supplementary Figure.1.** Positioning of the hook region comparison. A, Structure of *Bb*PGI with hook region N-terminal of  $\alpha$ -helix 20. B, Structure of rabbit PGI (PDB code: 1HM5) with hook region C-terminal of equivalent  $\alpha$ -helix to *Bb*PGI  $\alpha$ -helix 20. C, Superimposition of A onto B demonstrating differences in hook region positioning.

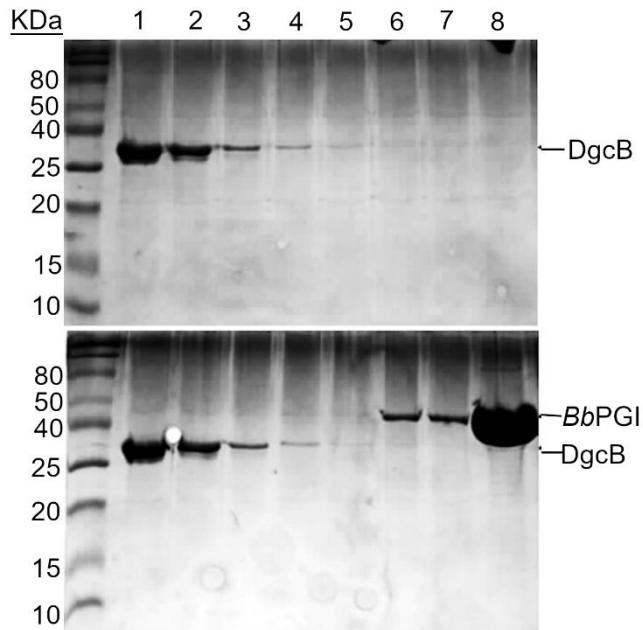

**Supplementary Figure.2.** SDS-PAGE gels of a pull-down assay investigating whether *BbPGI* interacts with thrombin cleaved wildtype DgcB. Top panel, DgcB only control showing DgcB is unable to bind to the nickel resin. Bottom Panel, *BbPGI* and DgcB incubated together, no coelution of DgcB with *BbPGI* observed suggesting no interaction. 1) Flowthrough; 2) Wash1; 3) Wash2; 4) Wash3; 5) Elution 1, 8% buffer B; 6) Elution 2, 8% buffer B; 7) Elution 3, 100% buffer B; 8) Elution 4, 100% buffer B.

## Supplementary Methods

### Pulldown Interaction Assay

DgcB was purified by previously reported protocols<sup>1</sup>, and dialysed against 500 mM NaCl, 2.5 mM CaCl<sub>2</sub>, and 20 mM HEPES pH 8.3 with 4 ul of thrombin (Merck Millipore) for two days at 4 °C. Uncleaved protein was removed by passing solution over a 5 ml HisTrap FF nickel column (GE Healthcare) before elution with 20 ml of buffer A (from main body methods). Eluted protein was dialysed overnight into 20 mM HEPES pH 7.0 and 200 mM NaCl. To remove thrombin from the sample, dialysed protein was passed over a 1 ml HiTrap Benzamidine FF column (GE Healthcare) and concentrated with Vivaspin® spin-concentrators (Sartorius) to 35.5 mg/ml. Nickel beads (100 µl)

were equilibrated in buffer A and transferred to a microcentrifuge tube. Thrombin cleaved DgcB and BbPGI were added to the beads (2 mg total of each). Buffer A was added to the beads to a final volume of 1 ml. Protein mix was rotated overnight at 4 °C to allow proteins to interact. Protein suspension was added to a 0.8 ml Bio-spin chromatography column (Bio-rad) and centrifuged at 300 RPM for 45 secs (flowthrough collected). Beads were washed three times with 500 µl buffer A, before elution with two 500 µl solutions of 8% buffer B in buffer A (v/v) and two 500 µl solutions of 100 % buffer B. All wash and elution steps were by centrifugation (300 RPM for 45 secs) in a benchtop centrifuge. Results were analysed by SDS-PAGE.

## References

1. Meek R.W., Cadby I.T., Moynihan P.J., Lovering A.L. Structural basis for activation of a diguanylate cyclase required for bacterial predation in *Bdellovibrio*. *Nat Commun* 10, 4086. (2019).
2. Arsenieva D., Jeffery C.J. Conformational changes in phosphoglucose isomerase induced by ligand binding. *J Mol Biol* 323, 77-84. (2002)
